# Supplementary material for: Carbon-ion radiotherapy for cholangiocarcinoma: a multi-institutional study by and the Japan carbon-ion radiation oncology study group (J-CROS)
Source: PubMed Central journal article supplement (PMC6633891; doi:10.18632/oncotarget.27028), 2019-07-09
Supplement: oncotarget-10-4369-s001.pdf [file oncotarget-10-4369-s001.pdf]

## Carbon-ion radiotherapy for cholangiocarcinoma: a multi-institutional study by the Japan carbon-ion radiation oncology study group (J-CROS)

### SUPPLEMENTARY MATERIALS

Supplementary Table 1: Prognostic factors for local control and progression-free survival

|                                               |              | Local control   |                     |          | Progression free survival |          |
|-----------------------------------------------|--------------|-----------------|---------------------|----------|---------------------------|----------|
|                                               |              | No. of patients | Univariate analyses |          | Univariate analyses       |          |
|                                               |              |                 | 1-year (%)          | <i>p</i> | 1-year (%)                | <i>p</i> |
| Age, years                                    | <76          | 33              | 74.5                | 0.855    | 42.2                      | 0.150    |
|                                               | ≥76          | 23              | 87.1                |          | 72.7                      |          |
| Sex                                           | Male         | 38              | 78.2                | 0.214    | 58.0                      | 0.905    |
|                                               | Female       | 18              | 82.5                |          | 46.2                      |          |
| Operability                                   | yes          | 10              | 100                 | 0.294    | 78.7                      | 0.411    |
|                                               | no           | 46              | 74.8                |          | 31.7                      |          |
| Performance status                            | 0/1          | 52              | 78.1                | 0.925    | 53.9                      | 0.853    |
|                                               | 2            | 4               | 100                 |          | 35.4                      |          |
| Child–Pugh class                              | A            | 52              | 81.1                | 0.347    | 56.3                      | 0.567    |
|                                               | B            | 4               | 0                   |          | 0                         |          |
| Prior therapy for cholangiocarcinoma          | yes          | 13              | 68.3                | 0.354    | 42.7                      | 0.348    |
|                                               | no           | 43              | 83.4                |          | 58.2                      |          |
| Cholangitis pre-CIRT                          | yes          | 11              | 44.4                | 0.080    | 36.4                      | 0.384    |
|                                               | no           | 45              | 87.3                |          | 58.4                      |          |
| Biliary stenosis pre-CIRT                     | yes          | 27              | 69.3                | 0.289    | 53.0                      | 0.511    |
|                                               | no           | 29              | 86.1                |          | 54.5                      |          |
| Stent treatment for biliary stenosis pre-CIRT | yes          | 24              | 70.0                | 0.365    | 50.7                      | 0.285    |
|                                               | no           | 32              | 83.6                |          | 55.7                      |          |
| Diagnostic method                             | Imaging      | 21              | 71.8                | 0.884    | 37.6                      | 0.123    |
|                                               | Pathological | 35              | 83.7                |          | 64.1                      |          |
| TNM stage                                     | T1-2N0M0     | 39              | 82.4                | 0.650    | 60.8                      | 0.252    |
|                                               | Advanced     | 17              | 71.3                |          | 35.8                      |          |
| Tumor size                                    | <37 mm       | 28              | 78.2                | 0.781    | 49.7                      | 0.670    |
|                                               | ≥37 mm       | 28              | 80.9                |          | 58.5                      |          |
| Tumor number                                  | Single       | 50              | 76.9                | 0.568    | 55.7                      | 0.471    |
|                                               | Multiple     | 6               | 100                 |          | 40.0                      |          |
| CA19-9                                        | <200         | 33              | 83.5                | 0.915    | 53.1                      | 0.345    |
|                                               | ≥200         | 23              | 72.7                |          | 54.9                      |          |
| CEA                                           | <10          | 48              | 78.8                | 0.454    | 56.2                      | 0.888    |
|                                               | ≥10          | 8               | 83.3                |          | 42.9                      |          |
| Total BED                                     | <105         | 23              | 81.6                | 0.765    | 51.8                      | 0.846    |
|                                               | ≥105         | 33              | 77.8                |          | 55.7                      |          |
| Fraction number                               | <20          | 20              | 81.8                | 0.857    | 58.2                      | 0.662    |
|                                               | ≥20          | 36              | 77.2                |          | 51.8                      |          |

HR: hazard ratio; CI: confidence interval; CA19-9: carbohydrate antigen 19-9; CEA: carcinoembryonic antigen; BED: biological effective dose.

**Supplementary Table 2: Factors predicting severe adverse events**

| <b>Factor</b>                                  |                         | <b><i>P</i>*</b> |
|------------------------------------------------|-------------------------|------------------|
| Age, years                                     | <76 vs ≥76              | 0.085            |
| Sex                                            | Male vs female          | 0.479            |
| Operability                                    | Yes vs no               | 0.093            |
| Performance status                             | 0/1 vs 2                | 0.606            |
| Child–Pugh class                               | A vs B                  | 0.680            |
| Prior therapy for cholangiocarcinoma           | Yes vs no               | 0.672            |
| Cholangitis pre-CIRT                           | Yes vs no               | 0.047            |
| Biliary stenosis pre-CIRT                      | Yes vs no               | 0.154            |
| Stenting therapy for biliary stenosis pre-CIRT | Yes vs no               | 0.363            |
| Diagnostic method                              | Imaging vs pathological | 0.267            |
| TNM stage                                      | T1-2N0M0 vs advanced    | 0.603            |
| Tumor size, mm                                 | <37 vs ≥37              | 0.500            |
| Tumor number                                   | Single vs multiple      | 0.445            |
| CA19-9, U/ml                                   | <200 vs ≥200            | 0.309            |
| CEA, mg/ml                                     | <10 vs ≥10              | 0.552            |
| Total BED                                      | <89 vs ≥89              | 0.670            |
| Fraction number                                | <20 vs ≥20              | 0.099            |

\*Fisher's exact test

HR: hazard ratio; CI: confidence interval; CA19-9: carbohydrate antigen 19-9; CEA: carcinoembryonic antigen; BED: biological effective dose.
